# Supplementary material for: Functional Mechanisms Underlying the Antimicrobial Activity of the Oryza sativa Trx-like Protein
Source: MDPI journal article supplement (doi:10.3390/ijms20061413), 2019-03-20
Supplement: s1 [file s1]

## Supplementary data

Figure S1.

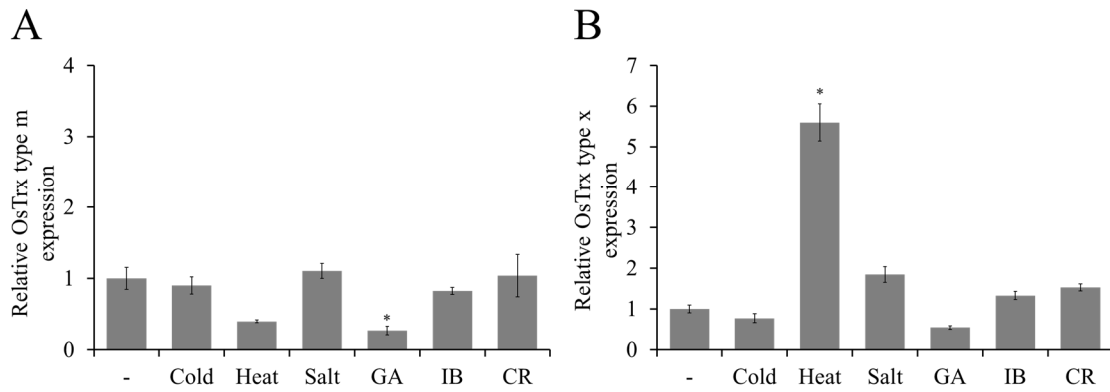

**Figure S1.** Expression level of two type *OsTrx* genes in rice treated with various external abiotic stresses. Rice seeds were irradiated with GA (200 Gy), IB (40 Gy), and CR (cosmic-rays). Ten-day-old rice seedlings were treated with heat (45°C), cold (4°C), and salt (200 mM NaCl). Error bars denote standard errors of biological replicates. Expression values of each gene are normalised against the expression of *OsActin*. Asterisks indicate statistical significance ( $P < 0.05$ , one-way ANOVA with a Tukey's *post hoc* test) of differences between control and stress treatment.

Figure S2.

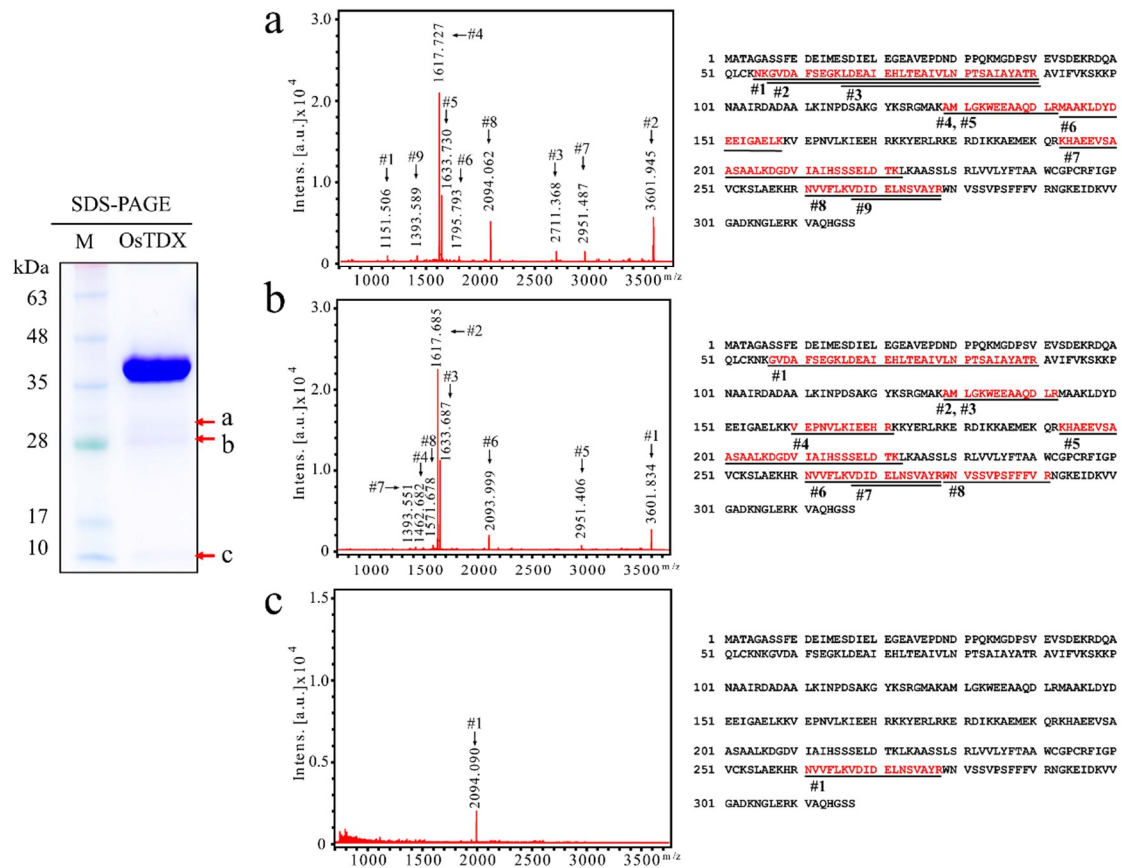

**Figure S2.** Purification and identification of OsTDX protein. Bacterially expressed recombinant OsTDX was resolved by 12 % SDS-PAGE (left panel; Fig. 2A) and MALDI-TOF analysis (right panel). (a, b and c) The labeled protein fragments by red arrows were identified as OsTDX proteins. Each trypsin digested peptide fragment (defined as #) is indicated by the underlined amino acids.
